# Supplementary material for: Neutral zero-valent s-block complexes with strong multiple bonding
Source: Springer Nature journal article supplement (doi:10.1038/nchem.2542), 2016-06-06
Supplement: 41557_2016_BFnchem2542_MOESM11_ESM.mol [file 41557_2016_BFnchem2542_MOESM11_ESM.mol]

nchem.2542-compCyLHBF4.mol
  ChemDraw05191617092D

 29 30  0  0  0  0  0  0  0  0999 V2000
   -1.9223   -0.2346    0.0000 C   0  0  0  0  0  0  0  0  0  0  0  0
   -1.9223   -0.9331    0.0000 C   0  0  0  0  0  0  0  0  0  0  0  0
   -1.2580   -1.1490    0.0000 C   0  0  0  0  0  0  0  0  0  0  0  0
   -0.8474   -0.5839    0.0000 C   0  0  0  0  0  0  0  0  0  0  0  0
   -1.2580   -0.0188    0.0000 N   0  3  0  0  0  0  0  0  0  0  0  0
   -1.0421    0.6456    0.0000 C   0  0  0  0  0  0  0  0  0  0  0  0
   -2.6170   -0.1616    0.0000 C   0  0  0  0  0  0  0  0  0  0  0  0
   -2.2064    0.4035    0.0000 C   0  0  0  0  0  0  0  0  0  0  0  0
   -0.2351    0.8171    0.0000 C   0  0  0  0  0  0  0  0  0  0  0  0
    0.0198    1.6017    0.0000 C   0  0  0  0  0  0  0  0  0  0  0  0
   -0.5322    2.2148    0.0000 C   0  0  0  0  0  0  0  0  0  0  0  0
   -1.3392    2.0433    0.0000 C   0  0  0  0  0  0  0  0  0  0  0  0
   -1.5941    1.2586    0.0000 C   0  0  0  0  0  0  0  0  0  0  0  0
   -2.4011    1.0871    0.0000 C   0  0  0  0  0  0  0  0  0  0  0  0
   -2.9532    1.7002    0.0000 C   0  0  0  0  0  0  0  0  0  0  0  0
   -2.6561    0.3025    0.0000 C   0  0  0  0  0  0  0  0  0  0  0  0
    0.3169    0.2040    0.0000 C   0  0  0  0  0  0  0  0  0  0  0  0
    0.0619   -0.5806    0.0000 C   0  0  0  0  0  0  0  0  0  0  0  0
    1.1239    0.3755    0.0000 C   0  0  0  0  0  0  0  0  0  0  0  0
   -1.8100   -1.7620    0.0000 C   0  0  0  0  0  0  0  0  0  0  0  0
   -1.5551   -2.5467    0.0000 C   0  0  0  0  0  0  0  0  0  0  0  0
   -0.7481   -2.7182    0.0000 C   0  0  0  0  0  0  0  0  0  0  0  0
   -0.1961   -2.1051    0.0000 C   0  0  0  0  0  0  0  0  0  0  0  0
   -0.4510   -1.3205    0.0000 C   0  0  0  0  0  0  0  0  0  0  0  0
    2.1309    1.8960    0.0000 B   0  5  0  0  0  0  0  0  0  0  0  0
    2.9532    1.8960    0.0000 F   0  0  0  0  0  0  0  0  0  0  0  0
    2.1309    1.0737    0.0000 F   0  0  0  0  0  0  0  0  0  0  0  0
    1.3087    1.8960    0.0000 F   0  0  0  0  0  0  0  0  0  0  0  0
    2.1309    2.7182    0.0000 F   0  0  0  0  0  0  0  0  0  0  0  0
  1  2  1  0      
  2  3  1  0      
  3  4  1  0      
  4  5  2  0      
  5  1  1  0      
  5  6  1  0      
  1  7  1  0      
  1  8  1  0      
  6  9  2  0      
  9 10  1  0      
 10 11  2  0      
 11 12  1  0      
 12 13  2  0      
 13  6  1  0      
 13 14  1  0      
 14 15  1  0      
 14 16  1  0      
  9 17  1  0      
 17 18  1  0      
 17 19  1  0      
  3 20  1  0      
 20 21  1  0      
 21 22  1  0      
 22 23  1  0      
 23 24  1  0      
 24  3  1  0      
 25 26  1  0      
 25 27  1  0      
 25 28  1  0      
 25 29  1  0      
M  CHG  2   5   1  25  -1
M  END
